# Supplementary material for: Poly(caffeic acid) Redox Couple Decorated on Electrochemically Reduced Graphene Oxide for Electrocatalytic Sensing Free Chlorine in Drinking Water
Source: MDPI journal article supplement (doi:10.3390/nano13010151), 2022-12-28
Supplement: s1 [file s1]

## **Supporting Information**

### **Poly(caffeic acid) redox couple decorated on electrochemically reduced graphene oxide for electrocatalytic sensing free chlorine in drinking water**

Srinivasan Kesavan<sup>†</sup>, Deivasigamani Ranjith Kumar<sup>†</sup>, Ganesh Dhakal, Woo Kyoung

Kim, Yong Rok Lee, Jae-Jin Shim\*

*School of Chemical Engineering, Yeungnam University, 280 Daehak-ro, Gyeongsan, Gyeongbuk  
38541, Republic of Korea*

---

<sup>†</sup>These authors contributed equally to this work.

\*Correspondence *E-mail address*: jjshim@yu.ac.kr (J.-J. Shim).

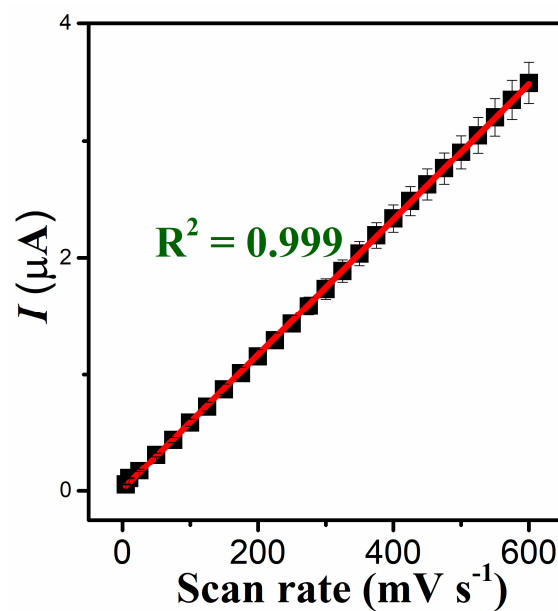

**Figure S1.** A plot of the anodic peak current vs. scan rate.

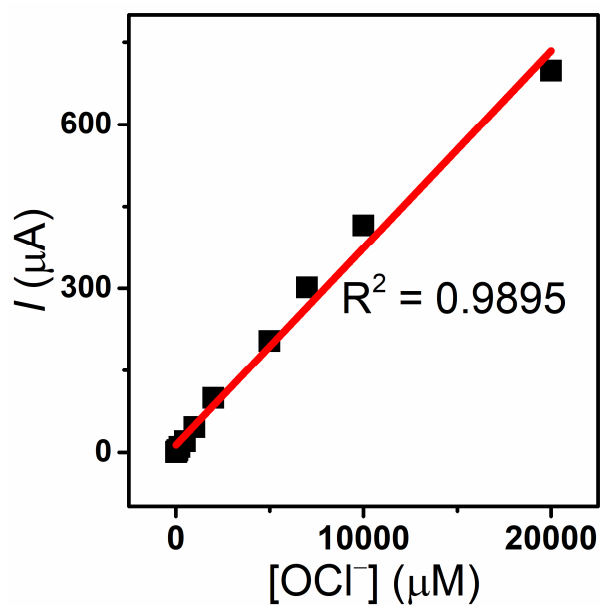

**Figure S2.** Amperometric  $i$ - $t$  curve for the determination of free-Cl on the p-CFA@ERGO/GC modified electrode at a wide concentration range: (a)

0.02, (b) 0.05, (c) 0.1, (d) 0.2, (e) 0.5, (f) 1, (g) 2, (h) 5, (i) 7, (j) 10, and (k) 20 mM addition.

**Table S1.** Measured binding energies and areas for common chemical states of carbon in the C 1s region of XPS.

| Sample        | Chemical state | Binding energy (eV) | Area    |
|---------------|----------------|---------------------|---------|
| GO/GC         | C–C            | 284.6               | 63,572  |
|               | C–OH/C–O–C     | 285.3               | 92,322  |
|               | C=O            | 287.1               | 15,562  |
|               | O=C–OH         | 288.0               | 51,909  |
|               | –COO–          | 291.6               | 8,267   |
| ERGO/GC       | C–C            | 284.6               | 131,220 |
|               | C–OH/C–O–C     | 285.5               | 32,805  |
|               | C=O            | 286.0               | 66,100  |
|               | O=C–OH         | 288.8               | 18,978  |
|               | –COO–          | 292.8               | 1,646   |
| p-CAF/GC      | C–C            | 284.6               | 34,555  |
|               | C–OH/C–O–C     | 285.0               | 69,707  |
|               | C=O            | 286.3               | 22,098  |
|               | O=C–OH         | 288.6               | 10784   |
|               | –COO–          | 291.4               | 1,336   |
| p-CAF@ERGO/GC | C–C            | 284.6               | 29,116  |
|               | C–OH/C–O–C     | 285.2               | 39,119  |
|               | C=O            | 286.5               | 14,558  |
|               | O=C–OH         | 288.5               | 10,560  |
|               | –COO–          | 292.0               | 4,317   |

**Table S2.**  $I_D/I_G$  and C/O ratios obtained from the Raman and XPS spectra.

| Sample        | Raman spectral data           |                               |           | XPS       |
|---------------|-------------------------------|-------------------------------|-----------|-----------|
|               | D band<br>(cm <sup>-1</sup> ) | G band<br>(cm <sup>-1</sup> ) | $I_D/I_G$ | C/O ratio |
| GO/GC         | 1351                          | 1594                          | 0.81      | 1.40      |
| ERGO/GC       | 1344                          | 1587                          | 1.33      | 2.11      |
| p-CAF@ERGO/GC | 1344                          | 1564                          | 1.0       | 0.47      |
